# Supplementary material for: Dose-Specific Adverse Drug Reaction Identification in Electronic Patient Records: Temporal Data Mining in an Inpatient Psychiatric Population
Source: PubMed Central journal article supplement — Drug Saf. 2014 Mar 15;37(4):237–47. doi: 10.1007/s40264-014-0145-z (PMC3975083; doi:10.1007/s40264-014-0145-z), 2014-03-15
Supplement: 40264_2014_145_MOESM1_ESM.pdf [file 40264_2014_145_MOESM1_ESM.pdf]

## Electronic Supplementary Material - Drug Safety

### Dose-specific adverse drug reaction identification in electronic patient records: temporal data mining in an inpatient psychiatric population

Robert Eriksson,<sup>1,2</sup> Thomas Werge,<sup>3</sup> Lars Juhl Jensen,<sup>1</sup> and Søren Brunak<sup>1,2,#</sup>

<sup>1</sup>NNF Center for Protein Research, Department of Disease Systems Biology, Faculty of Health and Medical Sciences, University of Copenhagen, DK-2200 Copenhagen, Denmark.

<sup>2</sup>Center for Biological Sequence Analysis, Department of Systems Biology, Technical University of Denmark, DK-2800 Lyngby, Denmark.

<sup>3</sup>The Research Institute of Biological Psychiatry, Mental Health Centre Sct. Hans, Copenhagen University Hospital, DK-4000 Roskilde, Denmark.

#Corresponding author: [soren.brunak@cpr.ku.dk](mailto:soren.brunak@cpr.ku.dk)

**Online Fig. 1** ..... 2

Online Fig. 1

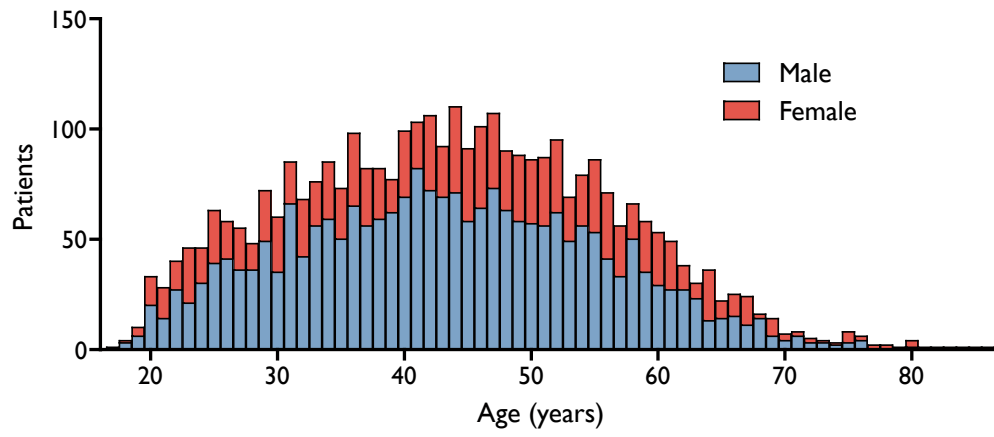

Online Fig. 1. Age and gender distribution of the study population
