# Supplementary material for: Dose-Specific Adverse Drug Reaction Identification in Electronic Patient Records: Temporal Data Mining in an Inpatient Psychiatric Population
Source: PubMed Central journal article supplement — Drug Saf. 2014 Mar 15;37(4):237–47. doi: 10.1007/s40264-014-0145-z (PMC3975083; doi:10.1007/s40264-014-0145-z), 2014-03-15
Supplement: 40264_2014_145_MOESM2_ESM.pdf [file 40264_2014_145_MOESM2_ESM.pdf]

## Electronic Supplementary Material - Drug Safety

### Dose-specific adverse drug reaction identification in electronic patient records: temporal data mining in an inpatient psychiatric population

Robert Eriksson,<sup>1,2</sup> Thomas Werge,<sup>3</sup> Lars Juhl Jensen,<sup>1</sup> and Søren Brunak<sup>1,2,#</sup>

<sup>1</sup>NNF Center for Protein Research, Department of Disease Systems Biology, Faculty of Health and Medical Sciences, University of Copenhagen, DK-2200 Copenhagen, Denmark.

<sup>2</sup>Center for Biological Sequence Analysis, Department of Systems Biology, Technical University of Denmark, DK-2800 Lyngby, Denmark.

<sup>3</sup>The Research Institute of Biological Psychiatry, Mental Health Centre Sct. Hans, Copenhagen University Hospital, DK-4000 Roskilde, Denmark.

<sup>#</sup>Corresponding author: [soren.brunak@cpr.ku.dk](mailto:soren.brunak@cpr.ku.dk)

**Online Fig. 2**..... 2

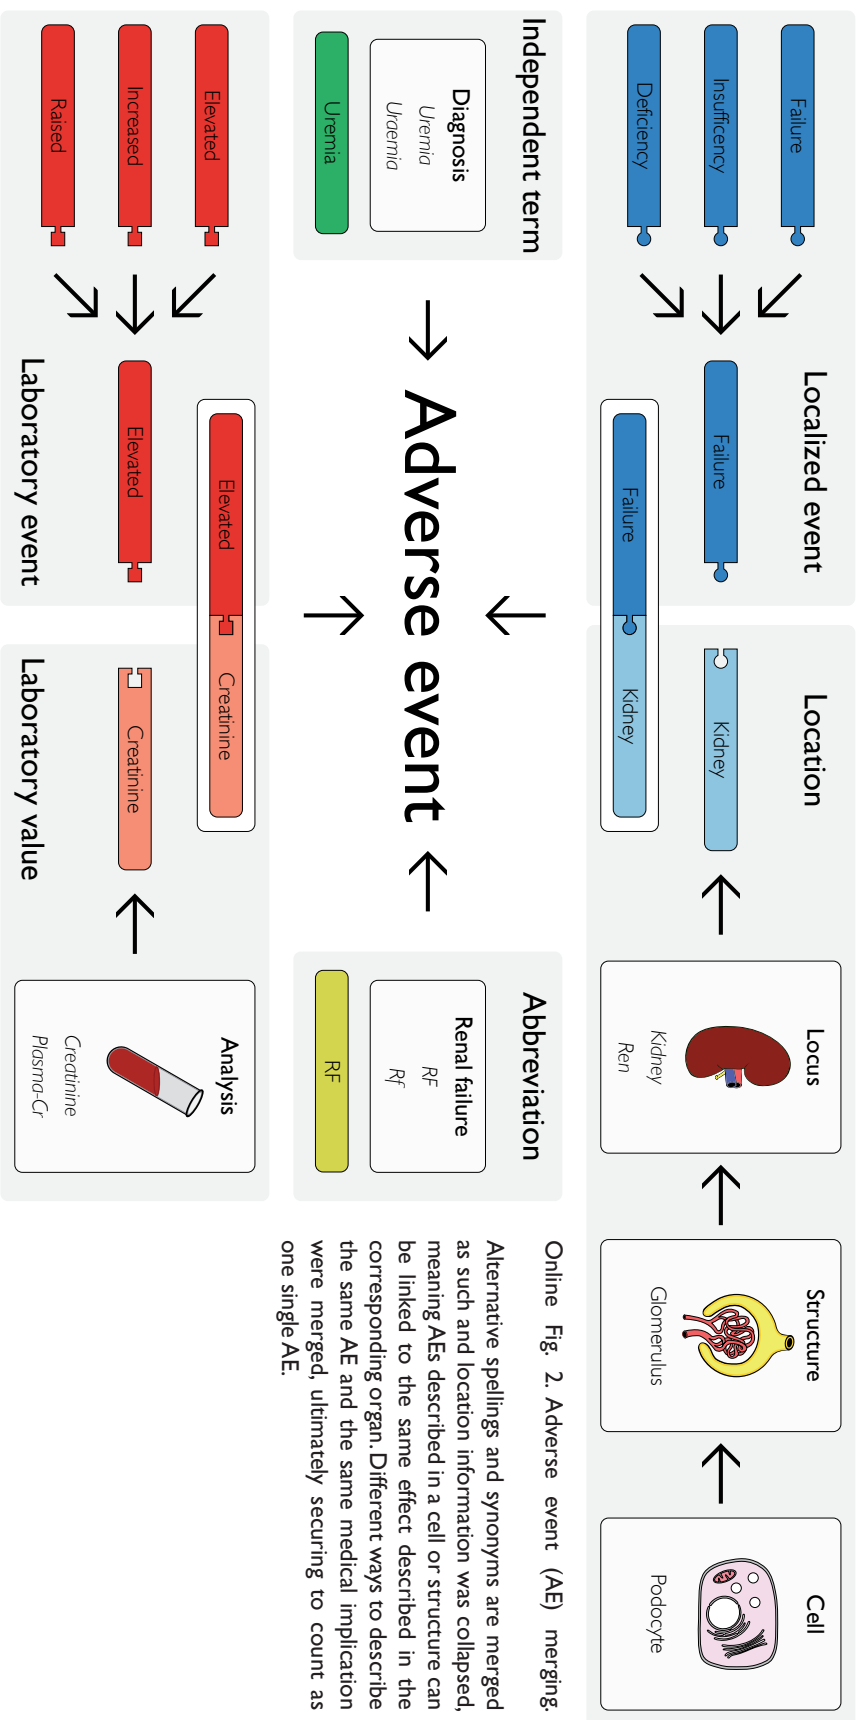

Online Fig. 2. Adverse event (AE) merging. Alternative spellings and synonyms are merged as such and location information was collapsed, meaning AEs described in a cell or structure can be linked to the same effect described in the corresponding organ. Different ways to describe the same AE and the same medical implication were merged, ultimately securing to count as one single AE.

Online Fig. 2
