# Supplementary material for: Dose-Specific Adverse Drug Reaction Identification in Electronic Patient Records: Temporal Data Mining in an Inpatient Psychiatric Population
Source: PubMed Central journal article supplement — Drug Saf. 2014 Mar 15;37(4):237–47. doi: 10.1007/s40264-014-0145-z (PMC3975083; doi:10.1007/s40264-014-0145-z), 2014-03-15
Supplement: 40264_2014_145_MOESM3_ESM.pdf [file 40264_2014_145_MOESM3_ESM.pdf]

## Electronic Supplementary Material - Drug Safety

### Dose-specific adverse drug reaction identification in electronic patient records: temporal data mining in an inpatient psychiatric population

Robert Eriksson,<sup>1,2</sup> Thomas Werge,<sup>3</sup> Lars Juhl Jensen,<sup>1</sup> and Søren Brunak<sup>1,2,#</sup>

<sup>1</sup>NNF Center for Protein Research, Department of Disease Systems Biology, Faculty of Health and Medical Sciences, University of Copenhagen, DK-2200 Copenhagen, Denmark.

<sup>2</sup>Center for Biological Sequence Analysis, Department of Systems Biology, Technical University of Denmark, DK-2800 Lyngby, Denmark.

<sup>3</sup>The Research Institute of Biological Psychiatry, Mental Health Centre Sct. Hans, Copenhagen University Hospital, DK-4000 Roskilde, Denmark.

<sup>#</sup>Corresponding author: [soren.brunak@cpr.ku.dk](mailto:soren.brunak@cpr.ku.dk)

**Online results** ..... 2

**Online references** ..... 2

## Online results

To compare our method to the spontaneous AE report approach, we acquired all suspected AEs on 18 May 2011 that had been reported to the Danish Medicines Agency (now Danish Health and Medicines Authority) for chlorprothixene. The drug was used to treat most patients (1,688) in the study population. During post approval safety monitoring, 157 individual cases of suspected AEs had been reported for chlorprothixene, spanning a broad range of types and severity with a shift towards extreme events among the most reported compared to our results. On average 19,778 individuals collected chlorprothixene prescriptions from pharmacies in Denmark each year between 1999 and 2010 [1]. In comparison, we extracted 342 unique patient–AE pairs involving AEs that were statistically significantly associated with the drug among the 1,688 patients prescribed chlorprothixene.

Spontaneous report submissions have a tendency to preferentially address serious and severe suspected AEs. This is visible in the data where the second-most reported AE in Denmark for chlorprothixene is neuroleptic malignant syndrome (NMS), which made up 3.8% of all reported suspected AEs, only surpassed by rash. The method identified NMS occurring during chlorprothixene treatment at 0.17% relative frequency and 0.12% absolute frequency. The latter number is in line with frequencies found in the literature (0.07%-0.24%) [2].

Both the apparent underreporting and the tendency to a larger extent report serious and severe suspected effects becomes clear by comparing this single hospital's EPR system with submitted reports for chlorprothixene, introduced more than 50 years ago [3].

## Online references

1. Statens Serum Institut - Statistiker. 2012. <http://www.medstat.dk/>. Accessed 27 Sep 2013.
2. Mann SC, Caroff SN, Keck Jr PE, Lazarus A. Neuroleptic malignant syndrome and related conditions. 2nd ed. Washington, DC, USA: American Psychiatric Publishing; 2003:3–5.
3. Ban TA. A history of the Collegium Internationale Neuro-Psychopharmacologicum (1957–2004). *Prog Neuropsychopharmacol Biol Psychiatry*. 2006;30:599–616.
